# Supplementary material for: Postpartum Stressors Cause a Reduction in Mechanical Brush Use in Dairy Cows
Source: MDPI journal article supplement (doi:10.3390/ani11113031), 2021-10-22
Supplement: s1 [file s1]

# Postpartum stressors cause a reduction in mechanical brush use in dairy cows

Benjamin Lecorps, Allison Welk, Daniel M. Weary, Marina A.G. von Keyserlingk\*

Animal Welfare Program, Faculty of Land and Food Systems, 2357 Main Mall,  
University of British Columbia, Vancouver BC V6T 1Z6

\*Corresponding author email: [marina.vonkeyserlingk@ubc.ca](mailto:marina.vonkeyserlingk@ubc.ca)

## Supplementary material 2:

### Statistical codes

To run in SAS

```
FILENAME REFFILE 'File directory';
```

```
PROC IMPORT DATAFILE=REFFILE  
DBMS=XLSX  
OUT=Experiment1;  
GETNAMES=YES;  
RUN;
```

```
data numbers;  
set Experiment1;  
run;
```

```
PROC CONTENTS;  
RUN;
```

```
data Baseline_D2;  
set Experiment1;  
if day in ('6','12','18','24','30','36') then delete;  
run;
```

\*Produce descriptive statistics **LOG Lat**;

```
proc means data=Baseline_D2 nmiss mean std stderr lclm uclm median min max qrange  
maxdec=2;  
var Day0_log_lat Day2_log_lat;  
run;
```

\*Test for the normality of the differences;

```
proc univariate data=Baseline_D2 normal;  
var Diff_log_lat;  
run;
```

```
*Run the Paired T-test;  
proc ttest data=Baseline_D2 plots=all;  
paired Day2_log_lat*Day0_log_lat;  
run;
```

```
*Produce descriptive statistics Brush use;  
proc means data=Baseline_D2 nmiss mean std stderr lclm uclm median min max qrange  
maxdec=2;  
var Day0_brush Day2_brush;  
run;
```

```
*Test for the normality of the differences;  
proc univariate data=Baseline_D2 normal;  
var Diff_brush;  
run;
```

```
*Run the Paired T-test;  
proc ttest data=Baseline_D2 plots=all;  
paired Day2_brush*Day0_brush;  
run;
```

### **Effects of first separation**

```
FILENAME REFFILE 'File directory';
```

```
PROC IMPORT DATAFILE=REFFILE  
DBMS=XLSX  
OUT=Experiment2;  
GETNAMES=YES;  
RUN;
```

```
data numbers;  
set Experiment2;  
run;
```

```
PROC CONTENTS;  
RUN;
```

```
proc sort;
```

```

by Day;
run;
proc univariate plot normal;
var Lat_brush Log_lat_brush Brush ;
run;

```

```

data Separation1;
set Experiment2;
if day in ('6','12','18','24','30','36') then delete;
run;

```

**\*\* SEPARATION 1 \*\***

```

*Log_latencies ;
Proc mixed data = Separation1;
Class Animal day Treatment;
Model Log_lat_brush = day Treatment day*Treatment/ residual ;
Repeated day / subject =Animal type=ar(1);
Lsmeans day/cl diff;
Run;

```

```

*Brush use;
Proc mixed data = Separation1;
Class Animal day Treatment ;
Model Brush = day Treatment day*Treatment / residual ;
Repeated day / subject =Animal type=ar(1);
Lsmeans day Treatment / cl diff;
Run;

```

## **Effects of permanent separation**

### **To run in R**

```

# Libraries to install
library(lmPerm)
library(ICC)
library(FactoMineR)
library(coin)
library(car)
library(lme4)
library(pgirmess)
library(outliers)
library(emmeans)
library(pwr)

```

```

#####
# Power calculation

```

```

#pwr.2p.test  two proportions (equal n)
#pwr.2p2n.test  two proportions (unequal n)
#pwr.anova.test  balanced one way ANOVA
#pwr.chisq.test  chi-square test
#pwr.f2.test  general linear model
#pwr.p.test  proportion (one sample)
#pwr.r.test  correlation
#pwr.t.test  t-tests (one sample, 2 sample, paired)
#pwr.t2n.test  t-test (two samples with unequal n)

# Experiment 1
pwr.t.test(n=NULL, d=0.6, power=0.8, sig.level=0.05, type=c("paired"))
#n = 24

# Experiment 2
pwr.anova.test(k = 2, n = NULL, f = 0.4, sig.level = 0.05, power = 0.8)
#n = 25

#####
Experiment2<-read.csv(file.choose(), sep=";", dec=",") # File opening
str(Experiment2) #

# Effects of second separation using non-parametric tests

# Create a subset including only Day 24 (baseline) and Day 30 (post-separation)
Exp2_24_30<-subset(Experiment2, Experiment2$Session=="24" |
Experiment2$Session=="30")

# Create a subset including only late-separation cows
Exp2_24_30Late<-subset(Exp2_24_30,Exp2_24_30$Treatment=="late-separation")

# Create a subset including only early-separation cows
Exp2_24_30Early<-subset(Exp2_24_30,Exp2_24_30$Treatment=="early-separation")

# Run Fisher-Pitman permutation tests
# Late separation cows
oneway_test(Lat_brush~factor(Session)|factor(Animal),data=Exp2_24_30Late,distributio
n=approximate (B=100000))
plot(Lat_brush~factor(Session),data= Exp2_24_30Late)
# ns
oneway_test(Brush~factor(Session)|factor(Animal),data=Exp2_24_30Late,distribution=a
pproximate (B=100000))
plot(Brush~factor(Session),data= Exp2_24_30Late)
# Z = 2.3864, p-value = 0.008 *

```

```
# Early separation cows
oneway_test(Lat_brush~factor(Session)|factor(Animal),data=Exp2_24_30Early,distributi
on=approximate (B=100000))
plot(Brush~factor(Session),data=Exp2_24_30Early)
# ns
oneway_test(Brush~factor(Session)|factor(Animal),data=Exp2_24_30Early,distribution=
approximate (B=100000))
plot(Brush~factor(Session),data=Exp2_24_30Early)
# ns
```
