# Supplementary material for: Postpartum Stressors Cause a Reduction in Mechanical Brush Use in Dairy Cows
Source: MDPI journal article supplement (doi:10.3390/ani11113031), 2021-10-22
Supplement: s1 [file s1]

# **Postpartum stressors cause a reduction in mechanical brush use in dairy cows**

Benjamin Lecorps, Allison Welk, Daniel M. Weary, Marina A.G. von Keyserlingk\*

Animal Welfare Program, Faculty of Land and Food Systems, 2357 Main Mall, University of British Columbia, Vancouver BC V6T 1Z6

\*Corresponding author email: [marina.vonkeyserlingk@ubc.ca](mailto:marina.vonkeyserlingk@ubc.ca)

## **Supplementary material 1:**

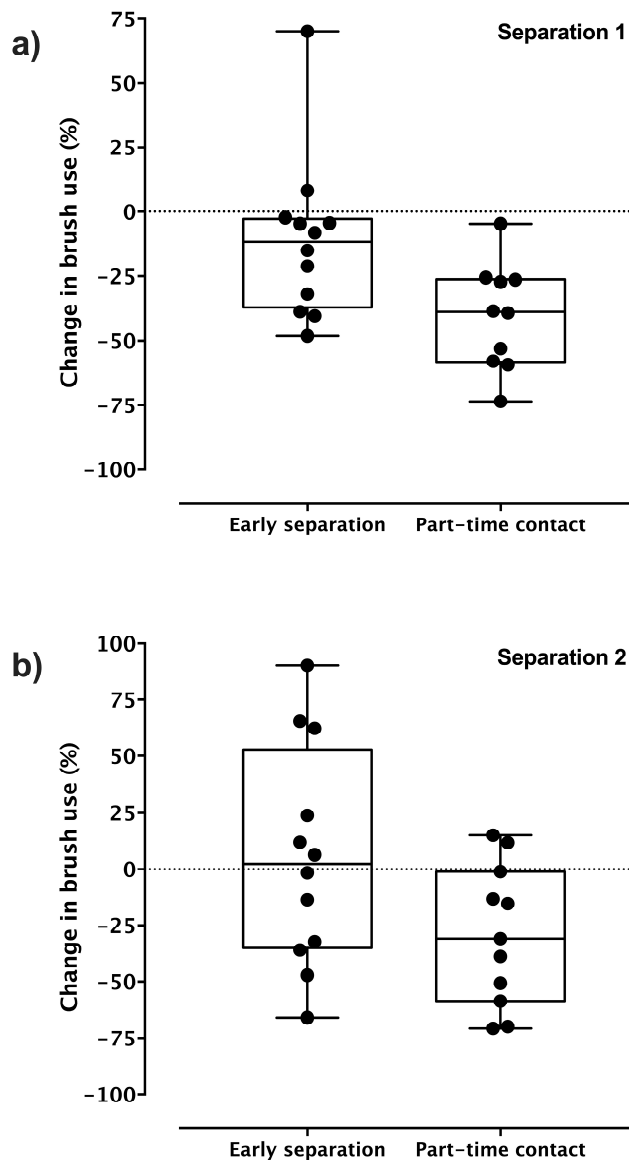

Supplementary Figure S1. Separation from the calf induces changes in brush use. Change in brush use on separation occurring on day 2 (a) and on day 30 (b) postpartum. Data presented come from Experiment 2.
