# Supplementary material for: Postpartum Stressors Cause a Reduction in Mechanical Brush Use in Dairy Cows
Source: Animals (Basel). 2021 Oct 22;11(11):3031. doi: 10.3390/ani11113031 (PMC8614528; doi:10.3390/ani11113031)
Supplement: Supplementary file 1 [file animals-11-03031-s001.zip › Supplementary Material 3.xlsx]

## Sheet: Data information
Dataset for 'Postpartum stressors cause a reduction in mechanical brush use in dairy cows'
Benjamin Lecorps, Allison Welk, Daniel M. Weary, Marina A.G. von Keyserlingk*
Animal Welfare Program, Faculty of Land and Food Systems, 2357 Main Mall, University of British Columbia, Vancouver BC V6T 1Z6
This dataset contains raw data for both experiments conducted

## Sheet: Experiment1_pre-partum
Animal	Week	Latency_brush	Brush_use
5120	-1	4.93	574.8
5135	-1	6.87	460.56
5143	-1	6.75	422.35
5144	-1	4.76	543.64
5147	-1	5.43	370.44
6001	-1	5.87	593
6005	-1	6.31	273.35
6006	-1	6.62	507.93
6008	-1	5.43	476.57
6009	-1	8.87	557.59
6011	-1	8.31	140.72
6012	-1	4.81	431.48
6013	-1	4.71	449.8
6019	-1	6.43	380.05
6023	-1	6.93	473.74
6025	-1	3.62	446.82
6028	-1	7.44	557.09
6029	-1	6.61	559.96
6030	-1	13.98	188.07
6044	-1	6.68	348.05
6046	-1	6.75	124.34
6047	-1	15.25	473.84
6055	-1	6.75	543.56
6057	-1	9.47	356.16
6061	-1	6.56	347.73
6067	-1	6.75	379.11
5120	-2	7	414.99
5135	-2	5.62	300.52
5143	-2	6.31	304.44
5144	-2	12.5	462.83
5147	-2	6.33	275.79
6001	-2
6005	-2	2.5	224.27
6006	-2	7.31	443.27
6008	-2	5.25	262.81
6009	-2	14.111	5.33
6011	-2	30.87	186.55
6012	-2	5.31	526.02
6013	-2	5.93	504.03
6019	-2	5.4	250.12
6023	-2	7.25	547.03
6025	-2	6.93	270.61
6028	-2	7.54	513.04
6029	-2	6.01	431.51
6030	-2	26.44	249.53
6044	-2	5	258.86
6046	-2	5.21	132.39
6047	-2	24.31	130
6055	-2	6.5	172.23
6057	-2	8.5	320.08
6061	-2	16.37	213.93
6067	-2	4.87	165.03
5120	-3	5.56	253.39
5135	-3	6.62	188.07
5143	-3	79.43	355.55
5144	-3	5.97	328.93
5147	-3	8	336.42
6001	-3	7.93	403.43
6005	-3	8.43	231.63
6006	-3	9.93	297.81
6008	-3	5.62	227.41
6009	-3	7.5	148.06
6011	-3	46.75	49.66
6012	-3	2.62	457.48
6013	-3	6.68	239.08
6019	-3	12.12	171.36
6023	-3	13.54	470.2
6025	-3	6.75	394.63
6028	-3	8.87	496.51
6029	-3	11.75	343.91
6030	-3	27.59	112.2
6044	-3	5.25	370.93
6046	-3	7.18	186.66
6047	-3	287.62	1.19
6055	-3	12.12	90.43
6057	-3	11.87	280.12
6061	-3	12.98	153.22
6067	-3	9.31	210.76
5120	-4	32.18	456.04
5135	-4	8.93	296.67
5143	-4	47.68	45.75
5144	-4	22.22	296.16
5147	-4	26.31	260.48
6001	-4	8.14	294.56
6005	-4	179.56	93.84
6006	-4	7.88	298.68
6008	-4	4.12	175.56
6009	-4	10.18	76.41
6011	-4	38.93	82.47
6012	-4	3.43	363.62
6013	-4	7.12	220.16
6019	-4	4.75	378.49
6023	-4	17.75	381.14
6025	-4	10.04	320.69
6028	-4	8.37	537.14
6029	-4	11.87	355.43
6030	-4	30.18	33.81
6044	-4	9.29	324.87
6046	-4	8.43	236.99
6047	-4
6055	-4	68.74	171.87
6057	-4	42.43	397.23
6061	-4
6067	-4	8.5	229.45

## Sheet: Experiment1_Raw data
Animal	Day	Latency_brush	Brush_use	Log_latency_brush
5120	Baseline	4.93	574.8	0.692847
5135	Baseline	6.87	460.56	0.836957
5143	Baseline	6.75	422.35	0.829304
5144	Baseline	4.76	543.64	0.677607
5147	Baseline	5.43	370.44	0.7348
6001	Baseline	5.87	593	0.768638
6005	Baseline	6.31	273.35	0.800029
6006	Baseline	6.62	507.93	0.820858
6008	Baseline	5.43	476.57	0.7348
6009	Baseline	8.87	557.59	0.947924
6011	Baseline	8.31	140.72	0.919601
6012	Baseline	4.81	431.48	0.682145
6013	Baseline	4.71	449.8	0.673021
6019	Baseline	6.43	380.05	0.808211
6023	Baseline	6.93	473.74	0.840733
6025	Baseline	3.62	446.82	0.558709
6028	Baseline	7.44	557.09	0.871573
6029	Baseline	6.61	559.96	0.820201
6030	Baseline	13.98	188.07	1.14551
6044	Baseline	6.68	348.05	0.824776
6046	Baseline	6.75	124.34	0.829304
6047	Baseline	15.25	473.84	1.18327
6055	Baseline	6.75	543.56	0.829304
6057	Baseline	9.47	356.16	0.97635
6061	Baseline	6.56	347.73	0.816904
6067	Baseline	6.75	379.11	0.829304
5120	2	7.5	397.43	0.875061
5135	2	10.43	71.52	1.01828
5143	2	7.68	64.47	0.885361
5144	2	5.87	314.49	0.768638
5147	2	6.18	206.03	0.790988
6001	2	8.68	493.95	0.93852
6005	2	8.56	116.52	0.932474
6006	2	7.31	113.72	0.863917
6008	2	26.56	169.25	1.42423
6009	2	11.31	149.18	1.05346
6011	2	8.06	99.88	0.906335
6012	2	6.93	482.33	0.840733
6013	2	7.55	255.55	0.877947
6019	2	7.18	128.81	0.856124
6023	2	6	485.13	0.778151
6025	2	8.17	318.31	0.912222
6028	2	8	273.9	0.90309
6029	2	8.81	94.71	0.944976
6030	2
6044	2	6.81	312.37	0.833147
6046	2	6.18	101.79	0.790988
6047	2	8.68	195.43	0.93852
6055	2	8.18	245.5	0.912753
6057	2	8.68	259.68	0.93852
6061	2	9.81	226.92	0.991669
6067	2	8.68	167.79	0.93852
5120	7	6.17	514.13	0.790285
5135	7	7.62	199.06	0.881955
5143	7	6.24	254.59	0.795185
5144	7	6.56	368.08	0.816904
5147	7	5.55	191.75	0.744293
6001	7	7.56	307.22	0.878522
6005	7	8.35	216.43	0.921686
6006	7	9.18	397.12	0.962843
6008	7	12.87	269.87	1.10958
6009	7	7.25	87.44	0.860338
6011	7	10.25	166.95	1.01072
6012	7	6.5	492.71	0.812913
6013	7	5	370.19	0.69897
6019	7	6.93	381.76	0.840733
6023	7		447.94
6025	7	6.31	108.83	0.800029
6028	7	8.5	386.53	0.929419
6029	7	7.81	308.6	0.892651
6030	7		77.06
6044	7	6.31	460.64	0.800029
6046	7	4.62	297.85	0.664642
6047	7	10.25	472.26	1.01072
6055	7	7.62	317.99	0.881955
6057	7	7.81	331.03	0.892651
6061	7	8.87	427.41	0.947924
6067	7	13.44	117.34	1.1284
5120	14	3.37	492.61	0.52763
5135	14	8.18	161.02	0.912753
5143	14	5.8	484.97	0.763428
5144	14	7.31	211.91	0.863917
5147	14	6.12	282.09	0.786751
6001	14	7.56	316.02	0.878522
6005	14	7.21	368.37	0.857935
6006	14	6.18	351.47	0.790988
6008	14	7.56	261.34	0.878522
6009	14	6.93	190.65	0.840733
6011	14	3.81	268.17	0.580925
6012	14	6.23	537.76	0.794488
6013	14	5.87	222.63	0.768638
6019	14	6.12	494.85	0.786751
6023	14	6.31	464.33	0.800029
6025	14	8.84	345.46	0.946452
6028	14	6.83	409.51	0.834421
6029	14	3.59	306.25	0.555094
6030	14	13.37	503.37	1.12613
6044	14	5	544.91	0.69897
6046	14	3.25	214.31	0.511883
6047	14	10.87	395.06	1.03623
6055	14	4.18	154.2	0.621176
6057	14	7.25	383.71	0.860338
6061	14	6.61	252.69	0.820201
6067	14	7.32	120.37	0.864511
5120	21	6.87	495.06	0.836957
5135	21	8.43	211.75	0.925828
5143	21	7.43	471.24	0.870989
5144	21	6.25	311.4	0.79588
5147	21	6.56	339.8	0.816904
6001	21	7.68	368.56	0.885361
6005	21	8.2	371.66	0.913814
6006	21	7.62	301	0.881955
6008	21	6.56	512.8	0.816904
6009	21	5.75	148.84	0.759668
6011	21	4.12	239.59	0.614897
6012	21	6.87	572.1	0.836957
6013	21	6.48	275.8	0.811575
6019	21	7.55	259.37	0.877947
6023	21	5.13	420.13	0.710117
6025	21	10.22	520.25	1.00945
6028	21	6.11	306.94	0.786041
6029	21	13.82	214.09	1.14051
6030	21	9.12	389.12	0.959995
6044	21	5.5	381.9	0.740363
6046	21	3.25	130.95	0.511883
6047	21	10.56	233.51	1.02366
6055	21	3.87	233.21	0.587711
6057	21	8.22	273.6	0.914872
6061	21	8	282.57	0.90309
6067	21	4.81	208.99	0.682145
5120	42	4.53	470.62	0.656098
5135	42	8.06	91.09	0.906335
5143	42	2.53	153.41	0.403121
5144	42	5.72	272.93	0.757396
5147	42	2.75	311.48	0.439333
6001	42	8.08	208.04	0.907411
6005	42	12.12	269.49	1.0835
6006	42	3.5	220.21	0.544068
6008	42	10.5	386.03	1.02119
6009	42	4.68	33.88	0.670246
6011	42	6.93	346.57	0.840733
6012	42	7.5	541.36	0.875061
6013	42	5.37	265.04	0.729974
6019	42	4.5	405.36	0.653213
6023	42	3.25	386.8	0.511883
6025	42	4.81	447.29	0.682145
6028	42	7.5	407.17	0.875061
6029	42	6.5	303.13	0.812913
6030	42	6.31	428.5	0.800029
6044	42	5.49	510.93	0.739572
6046	42	2.68	144.66	0.428135
6047	42	13.31	551.56	1.12418
6055	42	8.47	454.78	0.927883
6057	42	10.6	458.3	1.02531
6061	42	7.37	98.61	0.867467
6067	42	4.96	351.28	0.695482

## Sheet: Experiment2_Raw data
Animal	Day	Treatment	Lat_brush	Log_lat_brush	Brush
28	Baseline	Part-time contact	13.06	1.12	557.5
119	Baseline	Part-time contact	13.89	1.14	395.92
3059	Baseline	Part-time contact	12.06	1.08	502.25
3068	Baseline	Part-time contact	14.26	1.15	576.51
3074	Baseline	Part-time contact	11.81	1.07	458.75
3080	Baseline	Part-time contact	13.23	1.12	396.62
4079	Baseline	Part-time contact	13.47	1.13	544.12
5110	Baseline	Part-time contact	12.19	1.09	263.97
5114	Baseline	Part-time contact	14.59	1.16	498.35
6097	Baseline	Part-time contact	12.13	1.08	153.51
6093	Baseline	Part-time contact	52.84	1.72	452
2032	Baseline	Early-separation	13.66	1.14	398.35
2051	Baseline	Early-separation	11.25	1.05	519.46
3105	Baseline	Early-separation	13.75	1.14	506.78
3108	Baseline	Early-separation	21.14	1.33	441.71
4057	Baseline	Early-separation	16.7	1.22	303.27
4097	Baseline	Early-separation	11.19	1.05	452.42
5013	Baseline	Early-separation	15.45	1.19	558.02
5080	Baseline	Early-separation	27.66	1.44	201.53
5095	Baseline	Early-separation	12.22	1.09	339.28
5113	Baseline	Early-separation	14.16	1.15	551.54
6079	Baseline	Early-separation	14.56	1.16	520.18
6086	Baseline	Early-separation	12.28	1.09	234.45
28	2	Part-time contact	14.34	1.16	234.4
119	2	Part-time contact	17.14	1.23	186.08
3059	2	Part-time contact	14.87	1.17	365.44
3068	2	Part-time contact	17.12	1.23	550.04
3074	2	Part-time contact	15.69	1.2	278.92
3080	2	Part-time contact	13.1	1.12	243.72
4079	2	Part-time contact	13.03	1.11	405.01
5110	2	Part-time contact	13.56	1.13	107.49
5114	2	Part-time contact
6097	2	Part-time contact	14.8	1.17	40.63
6093	2	Part-time contact	38.54	1.59	333.01
2032	2	Early-separation	15.03	1.18	380.03
2051	2	Early-separation	15.01	1.18	562.25
3105	2	Early-separation	16.55	1.22	466.18
3108	2	Early-separation	18.47	1.27	422.57
4057	2	Early-separation	13.81	1.14	180.56
4097	2	Early-separation	15.7	1.2	308.32
5013	2	Early-separation	13.11	1.12	474.57
5080	2	Early-separation	15.56	1.19	342.73
5095	2	Early-separation	13.15	1.12	175.85
5113	2	Early-separation	14.56	1.16	434.95
6079	2	Early-separation	13.56	1.13	508.62
6086	2	Early-separation	16.75	1.22	143.5
28	6	Part-time contact	13.15	1.12	335.72
119	6	Part-time contact	14.34	1.16	517.83
3059	6	Part-time contact	12.75	1.11	258.91
3068	6	Part-time contact	14.32	1.16	251
3074	6	Part-time contact	15.53	1.19	529.33
3080	6	Part-time contact	12.38	1.09	193.01
4079	6	Part-time contact	14.25	1.15	218.87
5110	6	Part-time contact	12.78	1.11	325.11
5114	6	Part-time contact	13.18	1.12	517.4
6093	6	Part-time contact	45.4	1.66	503.03
6097	6	Part-time contact	29.28	1.47	167.5
2032	6	Early-separation	13.71	1.14	372.78
2051	6	Early-separation	14.35	1.16	472.53
3105	6	Early-separation	12.82	1.11	564.12
3108	6	Early-separation	14.87	1.17	131.22
4057	6	Early-separation	13.56	1.13	202.22
4097	6	Early-separation	13.25	1.12	300.57
5013	6	Early-separation	13.06	1.12	181.93
5080	6	Early-separation	14.97	1.18	164.42
5095	6	Early-separation	14.96	1.17	382.82
5113	6	Early-separation	15.81	1.2	400.32
6079	6	Early-separation	14.96	1.17	494
6086	6	Early-separation	20.09	1.3	540.15
28	12	Part-time contact	16.21	1.21	244.73
119	12	Part-time contact	14.75	1.17	560.97
3059	12	Part-time contact	18.38	1.26	327.66
3068	12	Part-time contact	14	1.15	322.34
3074	12	Part-time contact	14.5	1.16	541.88
3080	12	Part-time contact	11	1.04	323.99
4079	12	Part-time contact	17.9	1.25	323.56
5110	12	Part-time contact	12.72	1.1	166.41
5114	12	Part-time contact	14.31	1.16	519.45
6093	12	Part-time contact	36.1	1.56	462.7
6097	12	Part-time contact	22.93	1.36	177.38
2032	12	Early-separation	13.15	1.12	365.81
2051	12	Early-separation	15.19	1.18	566.4
3105	12	Early-separation	12.75	1.11	305.94
3108	12	Early-separation	13.78	1.14	69.75
4057	12	Early-separation	13.57	1.13	235.34
4097	12	Early-separation	15	1.18	469.47
5013	12	Early-separation	12.56	1.1	481.65
5080	12	Early-separation	21.43	1.33	222.98
5095	12	Early-separation	12.13	1.08	320.08
5113	12	Early-separation	16.9	1.23	314.23
6079	12	Early-separation	13.38	1.13	304.12
6086	12	Early-separation	10.25	1.01	475.19
28	18	Part-time contact	14.18	1.15	551.81
119	18	Part-time contact	5.47	0.74	302.74
3059	18	Part-time contact	13.66	1.14	240.78
3068	18	Part-time contact	13.06	1.12	290.73
3074	18	Part-time contact
3080	18	Part-time contact	13.53	1.13	273.31
4079	18	Part-time contact	13.72	1.14	451.82
5110	18	Part-time contact	13.35	1.13	285.38
5114	18	Part-time contact	26.88	1.43	442.56
6093	18	Part-time contact	49.05	1.69	501.15
6097	18	Part-time contact	23.06	1.36	176.34
2032	18	Early-separation	14.44	1.16	279.84
2051	18	Early-separation	13.53	1.13	443.93
3105	18	Early-separation	13.1	1.12	370.76
3108	18	Early-separation	24.53	1.39	474.88
4057	18	Early-separation	14.43	1.16	241.83
4097	18	Early-separation	15.59	1.19	511.75
5013	18	Early-separation	18.87	1.28	161.92
5080	18	Early-separation	13.03	1.11	264.59
5095	18	Early-separation	12.78	1.11	364.55
5113	18	Early-separation	16.28	1.21	552.39
6079	18	Early-separation	13.66	1.14	388.11
6086	18	Early-separation	11.09	1.04	395.56
28	24	Part-time contact	13.88	1.14	215.62
119	24	Part-time contact	15.01	1.18	300
3059	24	Part-time contact	14.42	1.16	408.34
3068	24	Part-time contact	12.68	1.1	539.95
3074	24	Part-time contact	14.36	1.16	302.57
3080	24	Part-time contact	12.82	1.11	255.22
4079	24	Part-time contact	13.07	1.12	246.11
5110	24	Part-time contact	12.75	1.11	373.13
5114	24	Part-time contact	12.79	1.11	459.95
6097	24	Part-time contact	37.59	1.58	120.44
6093	24	Part-time contact	35.1	1.55	440
2032	24	Early-separation	15.07	1.18	327.41
2051	24	Early-separation	14.17	1.15	524.62
3105	24	Early-separation	14.34	1.16	561.91
3108	24	Early-separation	17.53	1.24	246.53
4057	24	Early-separation	12.18	1.09	204.25
4097	24	Early-separation	16.59	1.22	474.54
5013	24	Early-separation	12.91	1.11	91.57
5080	24	Early-separation	17.25	1.24	182.17
5095	24	Early-separation	12.21	1.09	374.54
5113	24	Early-separation	21.46	1.33	336.81
6079	24	Early-separation	9.56	0.98	525.72
6086	24	Early-separation	7.53	0.88	284.29
28	30	Part-time contact	14.34	1.16	247.93
119	30	Part-time contact	15.07	1.18	183.08
3059	30	Part-time contact	13.94	1.14	282.21
3068	30	Part-time contact	12.68	1.1	534.15
3074	30	Part-time contact	14.79	1.17	149.14
3080	30	Part-time contact	13.07	1.12	284.93
4079	30	Part-time contact	11.57	1.06	74.38
5110	30	Part-time contact	13.54	1.13	109.62
5114	30	Part-time contact	15.8	1.2	388.34
6097	30	Part-time contact	14.68	1.17	49.71
6093	30	Part-time contact	20.87	1.32	381.14
2032	30	Early-separation	15.09	1.18	365.96
2051	30	Early-separation	15.6	1.19	335.84
3105	30	Early-separation	10.97	1.04	191.73
3108	30	Early-separation	16.11	1.21	469.35
4057	30	Early-separation	14.66	1.17	138.27
4097	30	Early-separation	11.12	1.05	466.96
5013	30	Early-separation	16.25	1.21	97.32
5080	30	Early-separation	12.49	1.1	301.62
5095	30	Early-separation	11.19	1.05	322.91
5113	30	Early-separation	24.51	1.39	546.81
6079	30	Early-separation	10.83	1.03	277.7
6086	30	Early-separation	12.12	1.08	352.31
